1     **Generation of multi-transgenic pigs using PiggyBac**  
2             **transposons co-expressing pectinase, xylanase,**  
3             **cellulase,  $\beta$ -1.3-1.4-glucanase and phytase**

4     **Haoqiang Wang<sup>1¶</sup>, Guoling Li<sup>1¶</sup>, Cuili Zhong<sup>2¶</sup>, Jianxin Mo<sup>2</sup>, Yue Sun<sup>2</sup>, Junsong**  
5     **Shi<sup>2</sup>, Rong Zhou<sup>2</sup>, Zicong Li<sup>1</sup>, Huaqiang Yang<sup>1,2</sup>, Zhenfang Wu<sup>1,2</sup>, Dewu Liu<sup>1\*</sup>**  
6     **and Xianwei Zhang<sup>1,2\*</sup>**

7     <sup>1</sup> National Engineering Research Center for Breeding Swine Industry, College of  
8     Animal Science, South China Agricultural University, Guangzhou, China.

9     <sup>2</sup> National Engineering Research Center for Breeding Swine Industry, Wens Foodstuff  
10    Group Co., Ltd, Yunfu, China.

11    \* **Corresponding authors:**

12    dwliu@scau.edu.cn (DL) and zxianw@163.com (XZ)

13    <sup>¶</sup> These authors contributed equally to this work.

## 15 **Abstract**

16 The current challenges facing the pork industry are to maximize feed efficiency and  
17 minimize fecal emissions. Unlike ruminants, pigs lack a number of digestive enzymes  
18 like pectinase, xylanase, cellulase,  $\beta$ -1.3-1.4-glucanase and phytase to hydrolyze the  
19 cell walls of grains to release endocellular nutrients into their digestive tracts. Herein,  
20 we synthesized multiple cellulase and pectinase genes derived from lower organisms  
21 and then codon optimized these genes to be expressed in pigs. These genes were then  
22 cloned into our previously optimized *XynB* (xylanase)- *EsAPPA* (phytase) bicistronic  
23 construct. We then successfully generated transgenic pigs that expressed four  
24 enzymes (*Pg7fn* (pectinase), *XynB* (xylanase), *EsAPPA* (phytase) and *TeEGI*  
25 (cellulase and  $\beta$ -glucanase)) using somatic cell cloning. Expression of these genes  
26 was parotid gland specific. Enzymatic assays using the saliva of these founders  
27 demonstrated high levels of phytase (2.0~3.4 U/mL) and xylanase (0.25~0.42 U/mL)  
28 activity, but low levels of pectinase (0.06~0.08 U/mL) activity. These  
29 multi-transgenic pigs are expected to contribute to enhance feed utilization and reduce  
30 environmental impact.

## 32 **Introduction**

33 In the pig industry, ineffective digestion causes excess nutrients to be released to the  
34 environment. This results in soil salinity and potential pollution to water and air[1].

35 Domestic pigs mainly feed on common cereal grains, oil seed meals and their  
36 by-products. These contain various anti-nutritional factors such as non-starch  
37 polysaccharides and phytic acid[2,3]. These anti-nutritional factors have an obvious  
38 effect on the digestion and absorption of nutrients. This is because it hinders the  
39 contact of endogenous digestive enzymes with chyme and hence slows down the  
40 nutritional diffusion rate into the intestines[1]. As a consequence, undigested nutrients  
41 containing large amounts of inorganic nitrogen and phosphorus are excreted by the  
42 pigs to stimulate growth of algae and other aquatic plants and hence enhance  
43 microbial proliferation that ultimately contributes to air pollution.

44 Several dietary manipulation strategies have been employed to reduce fecal output  
45 and nutrient excretion in swine. The most widely practiced strategy is to introduce  
46 phytate- or non-starch polysaccharides- degrading enzymes in the formula feed. These  
47 can effectively decrease nitrogen and/or phosphorus emissions and hence reduce  
48 environmental impact. However, various factors affect the catalytic activity of these  
49 microbial enzymes, such as feed processing and storage, feed components, pH,  
50 minerals and temperature. Recently, genetically engineered pigs that express specific  
51 or multiple digestive enzyme genes have provided an alternative strategy to replace  
52 dietary enzyme supplementation in feed. Recently study demonstrated that transgenic

53 pigs that produce salivary phytase had less than 75% of fecal phosphorus and required  
54 almost no inorganic phosphate supplementation for normal growth compared to non-  
55 transgenic pigs[4]. In our previous study, we established transgenic pigs that  
56 simultaneously expressed three microbial enzymes,  $\beta$ -glucanase, xylanase, and  
57 phytase in their salivary glands. This significantly enhanced growth and reduced fecal  
58 nitrogen and phosphorus levels in pigs[5].

59 In this study, we isolated and characterized several novel digestive enzyme genes, and  
60 then generated transgenic pigs that expressed these multiple enzymes, like pectinase,  
61 xylanase, cellulase,  $\beta$ -1.3-1.4-glucanase and phytase. These genes were expressed  
62 using a salivary gland promoter. The transgenic pigs had no adverse reactions and had  
63 better feed digestion compared to non-transgenic pigs.

## 64 **Results**

### 65 **Characterization of the three pectinase genes expressed in**

#### 66 **PK-15 cells**

67 Based on a previous study, we initially selected three pectinase genes *Pg7fn*, *PgaA*  
68 and *PGI* for our studies. Enzyme activity assays demonstrated that *Pg7fn* had the  
69 highest pectinase activity towards 1% polygalacturonic acid and 55%~70% for  
70 esterified pectin as the substrates, respectively. *PGI* had the second highest pectinase  
71 activity towards 1% polygalacturonic acid. However, the activity of *Pg7fn*, *PgaA* and  
72 *PGI* was less than 0.1 U/mL for > 85% esterified pectin (**Fig 1a, b and c**). We  
73 selected *Pg7fn* and *PGI* to determine their optimal pH in 1% polygalacturonic acid.

---

74 Enzyme activity of *Pg7fn* increased with pH between 1.0~4.0 and reached highest  
75 pectinase activity at pH 4.0, at approximately 1.15 U/mL. The high enzyme activity  
76 was stable at pH 4.0~6.0, and then decreased significantly after pH 6.0. *PGI* showed  
77 the same trend with *Pg7fn*, but reached its highest enzyme activity at pH 6.0 (**Fig 1d**).  
78 The relative pectinase activity of *Pg7fn* and *PGI* remained at least 56.8% and 46.8%  
79 during the stationary phase, respectively (**Fig 1e**). To simulate the pig's digestive tract,  
80 we treated *Pg7fn* and *PGI* at 39.5°C for two hours with different pepsin and trypsin  
81 pH solutions. The results indicated that pectinase activity of *PGI* was significantly  
82 decreased after pepsin or pH 6.5 trypsin treatment (**Fig 1f**). However, *Pg7fn* was not  
83 affected by treatment with pepsin and trypsin. Hence, *Pg7fn* was selected as the  
84 candidate gene.

85 **Fig 1. Characterization of the three pectinase genes expressed in PK-15 cells.**

86 Pectinase activities of *PgaA*, *Pg7fn* and *PGI* were evaluated using (a) 1%  
87 poly-galacturonic acid, (b) 55%~70% esterified pectin and (c) > 85% esterified pectin  
88 as substrates at pH 4.5, respectively. (d) Pectinase activity and (e) relative pectinase  
89 activity of *Pg7fn* and *PGI* at different pH levels (1.0~8.0). (f) *Pg7fn* and *PGI* were  
90 incubated with different pepsin and trypsin pH solutions at 39.5°C for two hours.  
91 Control represents pcDNA 3.1(+) vector. Data is shown as mean  $\pm$  SEM, n = 3  
92 (one-way ANOVA). \*  $P < 0.05$ , \*\*  $P < 0.01$ .

93 **Characterization of the six cellulase genes expressed in**  
94 **PK-15 cells**

---

95 We selected six endo- $\beta$ -1,4-endoglucanase genes *cel5B*, *egII*, *AG-egaseI*, *TeEGI*, *cel9*  
96 and *Bh-egaseI* to measure cellulase and  $\beta$ -glucanase activity at various pH conditions.  
97 *egII* and *TeEGI* cellulase activity were significantly higher (0.27 U/mL and 0.28  
98 U/mL, respectively (**Fig 2a**)) compared to the other genes for 1% sodium  
99 carboxymethyl cellulose. Furthermore,  $\beta$ -glucanase activity of *egII* and *TeEGI* were  
100 approximately 0.76 U/mL and 0.86 U/mL for 0.8%  $\beta$ -D-glucan as substrate,  
101 respectively. The other genes had activities of less than 0.09 U/mL (**Fig 2b**). To  
102 further clarify the enzymatic characteristics of *egII* and *TeEGI*, we optimized the pH  
103 levels of the reaction buffer. We found that *TeEGI* had the highest cellulase activities  
104 at pH 4.5 and had high residual activity after treatment with pH 3.5~7.0 (**Fig 2c and**  
105 **d**). *egII* had similar trends, however the optimal pH was 5.0. The  $\beta$ -glucanase activity  
106 of *TeEGI* was greater than 0.88 U/mL at pH 3.0~7.0 and reached the maximum of  
107 1.11 U/mL at pH 5.5 (**Fig 2e and f**). Compared to *TeEGI*, the highest  $\beta$ -glucanase  
108 activity of *egII* was 0.77 U/mL and had residual activity of greater than 50% between  
109 pH 2.0~7.0. We then investigated whether *egII* and *TeEGI* would have high enzyme  
110 activity in different pepsin and trypsin pH buffers. The results indicated that *TeEGI*  
111 was resistant to pepsin and trypsin digestion, but *egII*  $\beta$ -glucanase and cellulase were  
112 significantly inhibited at pH 2.0 pepsin buffer (**Fig 2g and h**). Hence, we selected  
113 *TeEGI* as the candidate cellulase and  $\beta$ -glucanase gene.

114 **Fig 2. Characterization of six cellulase genes expressed in PK-15 cells. (a)**  
115 cellulase or **(b)**  $\beta$ -glucanase activities of *cel5B*, *egII*, *AG-egaseI*, *TeEGI*, *cel9* and

---

116 *Bh-egaseI* were evaluated at suitable pH conditions. **(c)** Cellulase activity and **(d)**  
117 relative activity of *egII* and *TeEGI* at different pH levels (2.0~7.0). **(e)**  $\beta$ -glucanase  
118 activity and **(f)** relative activity of *egII* and *TeEGI* at different pH levels (2.0~7.0). **(g)**  
119 Cellulase and **(h)**  $\beta$ -glucanase activity of *egII* and *TeEGI* were measured following  
120 incubation with different pepsin and trypsin pH solutions. Control represents  
121 pcDNA3.1(+) vector. Data is shown as mean  $\pm$  SEM, n = 3 (t-test). \*  $P < 0.05$  or \*\*  $P$   
122  $< 0.01$ .

### 123 **Enzyme activity between polycistronic and monomeric** 124 **constructs**

125 To assess the polycistronic positions of the four genes (*Pg7fn*, *TeEGI*, *EsAPPA* and  
126 *xynB*), we initially included the 2A linker at the end of each corresponding gene.  
127 Previous studies had demonstrated that XynB protein with P2A residue at the  
128 C-terminus still had high xylanase activity in porcine saliva<sup>5</sup>. Our results  
129 demonstrated that the enzymatic activities of EsAPPA and Pg7fn with 2A residue also  
130 kept high relative activity ( $> 77\%$  and  $> 92\%$ , respectively) (**Fig 3a and b**). However,  
131 cellulase and  $\beta$ -glucanase activity of *TeEGI* with T2A was significantly reduced to  
132 64.8% and 55.1%, respectively (**Fig 3c**). We fused *Pg7fn*, *XynB*, *EsAPPA* and *TeEGI*  
133 genes head to tail with E2A, P2A and T2A linkers, and named the final construct  
134 *PXAT* (**Fig 3d**). *PXAT* was then ligated into pcDNA3.1(+) to evaluate enzyme  
135 activity. The results showed that using *PXAT*, the pectinase, xylanase, phytase,  
136 cellulase and  $\beta$ -glucanase enzyme activities were significantly reduced to 31.0%,

---

137 23.5%, 30.2%, 24.5% and 24.4%, respectively, compared to constructs expressing a  
138 single gene (**Fig 3e**). mRNA levels further confirmed that the four genes that were  
139 co-expressed were lower compared to mRNA levels expressed by the single gene  
140 constructs (**Fig 3f**).

141 **Fig 3. Enzyme activity between the polycistronic and single gene vector construct.**

142 The effect of 2A linker peptide on **(a)** pectinase, **(b)** phytase, **(c)** cellulase and  
143  $\beta$ -glucanase activity. **(d)** Schematic of the *PXAT* vector. **(e)** Enzyme activity between  
144 *PXAT* and its corresponding protein expressed by the single gene constructs. **(f)**  
145 relative mRNA expression levels between genes expressed with *PXAT* and single  
146 gene constructs. Control represents pcDNA3.1(+) vector. Data is shown as mean  $\pm$   
147 SEM, n = 3 (one-way ANOVA). \*  $P < 0.05$  or \*\*  $P < 0.01$ .

148 **Generation and identification of transgenic pigs**

149 *PXAT* was also inserted into the tissue-specific vector pPB-mPSP-loxp-neoEGFP-  
150 loxp to form the final transgene construct (mPSP-*PXAT*) (**Fig 4a**). The mPSP-*PXAT*  
151 contained the mouse parotid secretory protein (mPSP) promoter, loxp flanking the  
152 neo-EGFP marker genes and the left and right ends of the PiggyBac elements. For  
153 transgene cell line selection, PFFs were co-electroporated and G418 was used for  
154 selection. The EGFP marker gene was deleted in clonal cells using Cre enzyme prior  
155 to somatic cell nuclear transfer (**Fig 4b**). A total of two cell lines were pooled and  
156 used as nuclear donors. We transferred a total of 2,096 reconstructed embryos into 10  
157 recipient gilts. Four recipients became pregnant and delivered 9 Duroc piglets, of



158 which 7 were alive and 2 were dead (**S1 Table**). PCR sequencing demonstrated that 5  
159 founders were positive for the transgene (**Fig 4c**), but only 3 of which were alive (**Fig**  
160 **4d**). Southern blot and quantitative PCR demonstrated that three piglets carried two  
161 copies of the transgene (**Fig 4e and f**). A positive boar was euthanized and tissue  
162 samples collected to determine expression levels of transgenic mRNA at 10 months of  
163 age. The results showed that the four genes, i.e., *Pg7fn*, *XynB*, *EsAPPA* and *TeEGI*  
164 were highly expressed in the parotid gland, had low expression in the sublingual and  
165 submandibular gland, and not expressed in other tissues (**S1 Fig**). Enzymatic activity  
166 assays showed that the saliva from three founders were positive for pectinase,  
167 xylanase, and phytase (0.06~0.08 U/mL, 0.24~0.42 U/mL, 1.9~3.4 U/mL,  
168 respectively) (**Fig 4h~l**). Interestingly, although we were unable to detect cellulase  
169 and  $\beta$ -glucanase activity, the western blotting analysis indicated that the four genes  
170 (*PXAT*) were expressed (**Fig 4g**). The F1 pigs were obtained from 920307 transgenic  
171 pig by mating with 2 wild-type gilts, the results revealed that F1 pigs had pectinase,  
172 xylanase and phytase activities, but no cellulase and  $\beta$ -glucanase activities (**S2 Fig**),  
173 which were consistent with the founders. The growth rate of F1 transgenic pigs and  
174 wild-type littermates were measured, which shown that PXAT pigs had a tendency to  
175 improve growth performance. It took an average of 84 days for transgenic pigs to  
176 grow from 30 to 100kg, whereas wild-type pigs required about 96 days (**S3 Fig**). We  
177 also measured serum biochemical markers in both F1 transgenic and wild-type pigs

178 **(S2 Table)**. The results showed that the phosphorus content of transgenic pigs (3.32  
179 mM) was higher compared to wild-type pigs (2.79 mM).

180 **Fig 4. Generation and identification of the transgenic pigs.** **(a)** Schematic of the  
181 transgenic plasmid mPSP-PXAT. The mPSP-PXAT consisted of the mouse parotid  
182 secretory protein (mPSP) promoter, loxp system with the neo-EGFP marker protein,  
183 and a PiggyBac transposon. **(b)** EGFP was deleted using Cre recombinase prior to  
184 somatic cell nuclear transfer. **(c)** Genomic identification of transgenic piglets using  
185 PCR and gel electrophoresis. **(d)** Transgenic piglets at 2 weeks old (Original image in  
186 **S2 Raw image**). **(e)** Southern blot analysis of transgene integration in transgenic  
187 piglets. Genomic DNA was digested using *Kpn* I and *Eco47* III endonucleases. **(f)**  
188 Copy number determination in transgenic piglets by absolute quantification. **(g)**  
189 Western blotting analysis of Pg7fn, XynB, EsAPPA and TeEGI protein expression.  
190 Salivary amylase was used as a protein reference. **(h)** Salivary pectinase, **(i)** xylanase,  
191 **(j)** phytase, **(k)** cellulase and **(l)**  $\beta$ -glucanase expression at 4 months. The irrelevant  
192 lanes of gels and blots were removed (Images in **S1 Raw images**). M is the DNA  
193 marker, P indicates mPSP-PXAT plasmid; N and WT represent wild-type pigs. Data  
194 is shown as mean  $\pm$  SEM (one-way ANOVA). \*  $P < 0.05$ .

## 195 **Discussion**

196 Environmentally-friendly transgenic pigs could efficiently improve the absorption of  
197 anti-nutritional factors, enhance their growth, and reduced the emission of nitrogen  
198 and phosphorus to the environment[5]. Previous studies have demonstrated that

199 salivary phytase and xylanase produced from transgenic pigs could effectively reduce  
200 phosphorus and nitrogen emissions[4,6]. However, no studies to date have  
201 investigated cellulase or pectinase transgenic pigs. In this study, we initially selected  
202 three pectinase genes (*PgaA*, *Pg7fn* and *PGI*) and six cellulase genes (*cel5B*, *egII*,  
203 *AG-egaseI*, *TeEGI*, *cel9* and *Bh-egaseI*) based on previous studies. Our results  
204 demonstrated that *Pg7fn* and *TeEGI* had high enzyme activity at different pH levels,  
205 and maintained their stability in different pepsin and trypsin pH buffers. However,  
206 several genes had no detectable enzyme activity. These genes were derived from  
207 microorganisms and insects, and the PK-15 cell line that was used to express these  
208 genes were unable to properly recapitulate the post-translation modifications needed  
209 for enzyme activity. In addition, the polycistronic order of the four genes (*Pg7fn*,  
210 *XynB*, *EsAPPA* and *TeEGI*) were constructed using the 2A linker at the end of each  
211 corresponding gene. In PK-15 cells, our result demonstrated that the target protein with  
212 2A residue at the C-terminus significant reduced enzyme activity, such as *Pg7fn*,  
213 *EsAPPA* and *TeEGI*, in which, the activity of cellulase and  $\beta$ -glucanase (*TeEGI*) decline  
214 is most pronounced. It seemed that particular protein require special folding compared to  
215 the others. The 2A linker is derived from viruses, such as foot-and-mouth- disease  
216 virus (F2A), equine rhinitis A virus (E2A), thosea asigna virus (T2A), and porcine  
217 teschovirus-1 (P2A). When mRNA is translated, ribosomes jump from Gly to Pro in  
218 the 2A sequence. This results in the absence of a peptide bond between Gly and Pro.  
219 As a consequence, the upstream protein that is generated has a 17~19 amino acid

220 peptides that contains Gly at the C-terminus, while the downstream protein that is  
221 generated has a Pro residue at the N-terminus, which may affect the spatial folding of  
222 the protein. As mentioned previously, the incomplete cleavage of the 2A linker could  
223 reduce protein expression[7]. There is a parotid gland expression signal peptide in  
224 front of each gene, which seems to rule out the reason that the C-terminal protein  
225 stays on the endoplasmic reticulum due to the inability of 2A linker to completely  
226 cleave[8]. In addition, it is possible that some proteins are unable to be completely  
227 synthesized due to incomplete translation. This may explain why some of the PXAT  
228 enzyme activities were significantly reduced compared to proteins that were  
229 synthesized using the single-gene vector. Finally, the larger size of the PXAT  
230 construct may contribute to lower transfection efficiency compared to constructs  
231 having only a single gene[9].

232 We successfully generated three transgenic pigs expressing multiple digestive enzyme  
233 genes using the PiggyBac transposon system. Although the transgenic pigs could  
234 efficiently express pectinase, xylanase and phytase, we were unable to detect the  
235 enzyme activity of cellulase and  $\beta$ -glucanase. Western blot analysis indicated that the  
236 TeEGI protein was expressed. Previous study suggested that different post-  
237 translational modification manners have an effect on protein function[10]. Thus, we  
238 suspect that TeEGI lacks cellulase activity, possibly due to post-translational  
239 modification that alters the folding or function of the protein. Additional, although  
240 cellulase was secreted in PK-15 cells, interaction between various cells in an

241 individual could also affect protein function. The polyA tail plays a crucial role in  
242 transcription, translation and stabilization of mRNAs[11]. In our previous work, we  
243 used the *bGH-pA* (bovine growth hormone polyadenylation signal) as a termination  
244 sequence[5]. But in this study, we firstly utilized an unconventional polyA (3' UTR of  
245 parotid secretory protein as a termination sequence *pspA*) in order to evaluate its  
246 effect (**Fig 4a**). We inferred that *pspA* may affect the activity of cellulase and  
247  $\beta$ -glucanase. Due to the unavailability of porcine parotid gland cell lines, we used the  
248 PK-15 cell line to express the four enzyme genes driven by the CMV promoter.  
249 However, in animal models, multiple digestive enzyme genes are driven by the  
250 parotid secretory protein promoter. Hence, the low enzyme activity that was observed  
251 may be due to an incompatible promoter.

252 In summary, we successfully produced transgenic pigs using somatic cell transfer.  
253 These transgenic pigs expressed, under the control of parotid gland specific promoter,  
254 four enzyme genes (*Pg7fn* (pectinase), *XynB* (xylanase), *EsAPPA* (phytase) and  
255 *TeEGI* (cellulase and  $\beta$ -glucanase)). These transgenic animals are expected to offer a  
256 valuable experience for the global environmental concerns and the inefficient  
257 absorption of feed in livestock.

## 258 **Materials and Methods**

### 259 **Plasmid construction**

260 Three pectinase genes, *PgaA* (*Aspergillus niger* JL-15)[12], *Pg7fn* (*Thielavia*  
261 *arenaria* XZ7)[13] and *PGI* (*chaetomium sp*)[14]; one xylanase gene *XynB*

---

262 (*Aspergillus niger*)[5,15], one phytase gene *EsAPPA* (*Escherichia coli*)[5] and six  
263 cellulase and  $\beta$ -glucanase genes (respectively), *cel5B* (*Gloeophyllum trabeum*)[16],  
264 *egII* (*Pichia pastoris*)[17], *AG-egaseI* (*Apriona germari*)[18], *TeEGI* (*Teleogryllus*  
265 *emma*)[19], *cel9* (*Clostridium phytofermentans*)[20] and *Bh-egaseI* (*Batocera*  
266 *horsfieldi*)[21] were optimized and synthesized based on pig codon preferences using  
267 Genscript (Nanjing, China). They were then cloned into pcDNA3.1(+). *Pg7fn*, *XynB*,  
268 *EsAPPA* and *TeEGI* genes were then head-to-tail ligated using E2A, P2A and T2A  
269 linkers. The ligated construct was named *PXAT*. *PXAT* was then inserted into  
270 pcDNA3.1(+) and enzyme activity was evaluated. *PXAT* was also inserted into the  
271 tissue-specific vector pPB-mPSP-loxp-neoEGFP-loxp[5] to generate the final  
272 transgene construct (mPSP-PXAT). The primer sets used for cloning are listed in **S3**  
273 **Table**.

## 274 **Cell culture and transfection**

275 The PK-15 cell line (ATCC CCL-33) and porcine fetal fibroblasts (PFFs) were  
276 cultured in DMEM (Thermo Fisher Scientific, Suwanee, GA,USA) supplemented  
277 with 10% fetal bovine serum (Thermo Fisher Scientific, Suwanee, GA,USA). To  
278 evaluate enzyme activity, PK-15 were grown to 70% confluence, and then transfected  
279 using lipofectamine LTX reagent (Thermo Fisher Scientific, Suwanee, GA,USA). 60  
280 hrs post-transfection, the culture supernatant was collected for enzyme assays. For  
281 transgene cell line selection, PFFs were co-electroporated with a circular transposase  
282 plasmid pCMV-hyPBase and a circular mPSP-PXAT plasmid using the program

283 A-033 on the Nucleofector 2b Device (Amaxa Biosystems/Lonza, Cologne,  
284 Germany). After cell attachment, 400 µg/ml G418 (Gibco) was added to the culture  
285 media for cell selection. Clonal cells expressing green fluorescence were selected and  
286 identified by PCR and sequencing.

## 287 **Generation of transgenic pigs**

288 The EGFP marker gene and neomycin resistant gene (neoR) were removed from  
289 transgenic cells using Cre enzyme (Excellgen, Rockville, MD USA) and then mixed  
290 multiple positive clones as nuclear donors for somatic cell nuclear transfer. Somatic  
291 cell nuclear transfer was described as previously studied[5]. The reconstructed  
292 embryos were transferred into recipient gilts, and piglets were naturally born after  
293 gestation. Afterwards, genomic DNA was extracted and sequenced using PCR (**S4**  
294 **Table**). Additionally, mRNA was extracted from porcine tissue samples and reversed  
295 transcribed to cDNA to be used as the template for qPCR. Relative quantitative  
296 Real-time PCR was used to identify mRNA expression levels in transgenic pigs and  
297 absolute quantitative Real-time PCR was used to detect copy number in transgenic  
298 pigs (primers used are listed in **S5 Table**).

## 299 **Southern and western blot analysis**

300 Genomic DNA was digested with restriction enzymes *Kpn* I or *Eoc47* III, and then  
301 run on an 0.8% agarose gel. The digested fragments were then transferred to a nylon  
302 membrane. The membrane was hybridized using digoxigenin-labeled DNA probes  
303 (**S4 Table**) for *mPSP* based on the DIG-High Prime DNA Labeling and Detection

304 Starter Kit II protocol (Roche, Mannheim, Germany). For western blotting, saliva was  
305 collected and then ultra-filtrated using a centrifugal filter (Millipore, Massachusetts,  
306 USA). Total protein from saliva was then electrophoresed on an SDS polyacrylamide  
307 gel, and subsequently transferred to a polyvinylidene fluoride membrane (Millipore,  
308 Massachusetts, USA). The membranes were incubated overnight at 4°C with primary  
309 rabbit polyclonal antibodies (**S6 Table**) against Pg7fn, XynB, EsAPPA or TeEGI  
310 (purchased from Genscript, Nanjing, China). The salivary amylase antibody (ab34797,  
311 Abcam) was used to confirm equal protein loading and the dilution ratio was 1: 1000.  
312 Membranes were then washed and incubated with a secondary IgG antibody. Bands  
313 were visualized using the UVP software.

### 314 **Enzyme analysis assay**

315 Cell culture supernatants and porcine saliva were centrifuged and used for enzyme  
316 analysis assays. Pectinase, xylanase,  $\beta$ -glucanase and cellulase activity were assayed  
317 using 1% (w/v) polygalacturonic acid (and 55%~70% esterified pectin, > 85%  
318 esterified pectin), 1% (w/v) xylan, 0.8% (w/v)  $\beta$ -D-glucan, and 1% (w/v) sodium  
319 carboxymethyl cellulose as the substrates, respectively. Reducing sugar content was  
320 measured using the 3,5-dinitrosalicylic acid (DNS) method[5,14,16]. One unit of  
321 enzyme activity was defined as the rate at which 1  $\mu$ mol of reducing sugar was  
322 released per minute. Phytase activity in saliva was measured as previously  
323 described[5].

324 The optimal pH of these proteins were determined at 39.5°C for 30 min in buffers of



325 pH 1.0~8.0. The buffers used were 0.2 M potassium chloride (KCl)- hydrochloric acid  
326 (HCl) for pH 1.0, 0.2 M glycine-HCl for pH 2.0~3.0, and 0.2 M citric acid-disodium  
327 hydrogen phosphate (Na<sub>2</sub>HPO<sub>4</sub>) for pH 4.0~8.0. All protein tolerance tests were  
328 measured after buffer treatment for 2 h under optimal conditions (optimal pH, 39.5°C  
329 and 30 min).

### 330 **Feeding management**

331 Transgenic pigs and wild-type littermates were fed on the same diet (**S7 Table**). They  
332 were raised in the same pens fitted with MK3 FIRE feeders (FIRE, Osborne Industries  
333 Inc., Osborne, KS). Individual daily feed intake and body weights were recorded  
334 when the pigs accessed the FIRE feeders. All pigs had free access to feed and  
335 drinking water throughout the growth phase. Blood was sterile collected at 90 days of  
336 age. Serum biochemical parameters of growing-finishing pigs were determined using  
337 a Hitachi 7020 full-automatic biochemical analyzer (Japan).

### 338 **Statistical analysis**

339 Data was analyzed using the IBM SPSS Statistics 20 (IBM SPSS, Chicago, IL, USA)  
340 or SAS9.4 (SAS Inst. Inc., Cary, NC, USA). For enzyme analysis and relative gene  
341 expression, one-way ANOVA was used. For serum biochemical data, unpaired t-test  
342 (two-tailed) was used. For growth performance, a total of 3 F1 transgenic pigs (1 boar,  
343 2 gilts) and 6 wild-type littermates (3 boars, 3 gilts) were test. When it comes to  
344 statistics, multivariate analysis of variance (MANOVA) was performed using the  
345 GLM procedure, with sex and initial weight used as the covariate. Data was expressed

346 as mean  $\pm$  SEM.  $P < 0.05$  considered statistically significant.

## 347 **Acknowledgments**

348 We gratefully acknowledge Ranbiao Mai, Wanxian Yu, and Lvhua Luo (Wens  
349 Foodstuff Group Co., Ltd) for somatic cell nuclear transfer and Wenxu Feng for  
350 embryo transfer. We thank Xiaofang Ruan and Guangyan Huang (South China  
351 Agricultural University) for saliva and tissue sample collection.

## 352 **References**

- 353 1. Shirali M, Doeschl-Wilson A, Knap PW, Duthie C, Kanis E, van Arendonk JA, et  
354 al. Nitrogen excretion at different stages of growth and its association with  
355 production traits in growing pigs. *J Anim Sci.* 2012; 90(6): 1756-65. PMID:  
356 22178856.
- 357 2. Gilani GS, Cockell KA, Sepehr E. Effects of antinutritional factors on protein  
358 digestibility and amino acid availability in foods. *J AOAC Int.* 2005; 88(3):  
359 967-87. PMID: 16001874.
- 360 3. Bohn L, Meyer AS, Rasmussen SK. Phytate: impact on environment and human  
361 nutrition. A challenge for molecular breeding. *J Zhejiang Univ Sci B.* 2008; 9(3):  
362 165-91. PMID: 18357620.
- 363 4. Golovan SP, Meidinger RG, Ajakaiye A, Cottrill M, Wiederkehr MZ, Barney DJ,  
364 et al. Pigs expressing salivary phytase produce low-phosphorus manure. *Nat*  
365 *Biotechnol.* 2001; 19(8): 741-5. PMID: 11479566.
- 366 5. Zhang X, Li Z, Yang H, Liu D, Cai G, Li G, et al. Novel transgenic pigs with

- 367 enhanced growth and reduced environmental impact. *Elife*. 2018 May 22; 7. pii:  
368 e34286. PMID: 29784082.
- 369 6. Zhang M, Cai G, Zheng E, Zhang G, Li Y, Li Z, et al. Transgenic pigs expressing  
370 beta-xylanase in the parotid gland improve nutrient utilization. *Transgenic Res*.  
371 2019; 28(2): 189-98. PMID: 30637610.
- 372 7. Velychko S, Kang K, Kim SM, Kwak TH, Kim KP, Park C, et al. Fusion of  
373 Reprogramming Factors Alters the Trajectory of Somatic Lineage Conversion.  
374 *Cell Rep*. 2019; 27(1): 30-9. PMID: 30943410.
- 375 8. de Felipe P, Luke GA, Brown JD, Ryan MD. Inhibition of 2A-mediated 'cleavage'  
376 of certain artificial polyproteins bearing N-terminal signal sequences. *Biotechnol*  
377 *J*. 2010; 5(2): 213-23. PMID: 19946875.
- 378 9. Kreiss P, Cameron B, Rangara R, Mailhe P, Aguerre-Charriol O, Airiau M, et al.  
379 Plasmid DNA size does not affect the physicochemical properties of lipoplexes  
380 but modulates gene transfer efficiency. *Nucleic Acids Res*. 1999; 27(19): 3792-8.  
381 PMID: 10481017.
- 382 10. Knorre DG, Kudryashova NV, Godovikova TS. Chemical and functional aspects  
383 of posttranslational modification of proteins. *Acta Naturae*. 2009; 1(3): 29-51.  
384 PMID: 22649613.
- 385 11. Edmonds M. A history of poly A sequences: from formation to factors to function.  
386 *Prog Nucleic Acid Res Mol Biol*. 2002; 71: 285-389. PMID: 12102557.
- 387 12. Liu MQ, Dai XJ, Bai LF, Xu X. Cloning, expression of *Aspergillus niger* JL-15

- 388        endo-polygalacturonase A gene in *Pichia pastoris* and oligo- galacturonates  
389        production. *Protein Expr Purif.* 2014; 94: 53-9. PMID: 24231374.
- 390    13. Tu T, Meng K, Huang H, Luo H, Bai Y, Ma R, et al. Molecular characterization  
391        of a thermophilic endopolygalac-turonase from *Thielavia arenaria XZ7* with high  
392        catalytic efficiency and application potential in the food and feed industries. *J*  
393        *Agric Food Chem.* 2014; 62(52): 12686-94. PMID: 25494480.
- 394    14. Tu T, Meng K, Bai Y, Shi P, Luo H, Wang Y, et al. High-yield production of a  
395        low-temperature-active polygalacturonase for papaya juice clarification. *Food*  
396        *Chem.* 2013; 141(3): 2974-81. PMID: 23871048.
- 397    15. Deng P, Li DF, Cao YH, Lu WQ, Wang CL. Cloning of a gene encoding an  
398        acidophilic endo-beta-1,4-xylanase obtained from *Aspergillus niger* CGMCC1067  
399        and constitutive expression in *Pichia pastoris*. *Enzyme Microb Technol.* 2006;  
400        39(5): 1096-102. <https://doi.org/10.1016/j.enzmictec.2006.02.014>.
- 401    16. Kim HM, Lee YG, Patel DH, Lee KH, Lee DS, Bae HJ. Characteristics of  
402        bifunctional acidic endoglucanase (*Cel5B*) from *Gloeophyllum trabeum*. *J Ind*  
403        *Microbiol Biotechnol.* 2012; 39(7): 1081-9. PMID: 22395898.
- 404    17. Akbarzadeh A, Ranaei Siadat SO, Motallebi M, Zamani MR, Barshan Tashnizi M,  
405        Moshtaghi S. Characterization and high level expression of acidic endoglucanase  
406        in *Pichia pastoris*. *Appl Biochem Biotechnol.* 2014; 172(4): 2253-65. PMID:  
407        24347161.
- 408    18. Lee SJ, Kim SR, Yoon HJ, Kim I, Lee KS, Je YH, et al. cDNA cloning,

- 409 expression, and enzymatic activity of a cellulase from the mulberry longicorn  
410 beetle, *Apriona germari*. *Comp Biochem Physiol B Biochem Mol Biol*. 2004;  
411 139(1): 107-16. PMID: 15364293.
- 412 19. Kim N, Choo YM, Lee KS, Hong SJ, Seol KY, Je YH, et al. Molecular cloning  
413 and characterization of a glycosyl hydrolase family 9 cellulase distributed  
414 throughout the digestive tract of the cricket *Teleogryllus emma*. *Comp Biochem*  
415 *Physiol B Biochem Mol Biol*. 2008; 150(4): 368-76. PMID: 18514003.
- 416 20. Zhang XZ, Sathitsuksanoh N, Zhang YH. Glycoside hydrolase family 9  
417 processive endoglucanase from *Clostridium phytofermentans*: Heterologous  
418 expression, characterization, and synergy with family 48 cellobiohydrolase.  
419 *Bioresour Technol*. 2010; 101(14): 5534-8. PMID: 20206499.
- 420 21. Mei HZ, Xia DG, Zhao QL, Zhang GZ, Qiu ZY, Qian P, et al. Molecular cloning,  
421 expression, purification and characterization of a novel cellulase gene  
422 (*Bh-EGaseI*) in the beetle *Batocera horsfieldi*. *Gene*. 2016; 576: 45-51. PMID:  
423 26410410.

## 424 **Supporting information**

425 **S1 Raw images. The full scan of all gels and blots.**

426 **S2 Raw image. The raw image of transgenic piglets at 2 weeks old.**

427 **S1 Fig. Relative mRNA levels of *PXAT* in various tissues from 10-month old**  
428 **transgenic pigs.**

429 **S2 Fig. The enzyme activities of the F1 transgenic pigs.**

430 **S3 Fig. Growth rate of F1 transgenic pigs and wild-type littermates during the**  
431 **growing period (30 kg to 100 kg).**

- 432 **S1 Table. Embryo transfer data for cloned pigs.**
- 433 **S2 Table. Serum biochemical information for F1 transgenic pigs.**
- 434 **S3 Table. Primers used in vector construction.**
- 435 **S4 Table. Primers used in PCR and probes in southern blotting.**
- 436 **S5 Table. Primers used in quantitative real-time PCR and absolute quantitative**
- 437 **real-time PCR.**
- 438 **S6 Table. Customized primary antibody information in western blotting.**
- 439 **S7 Table. Pig growth and fattening stage feed formulas.**

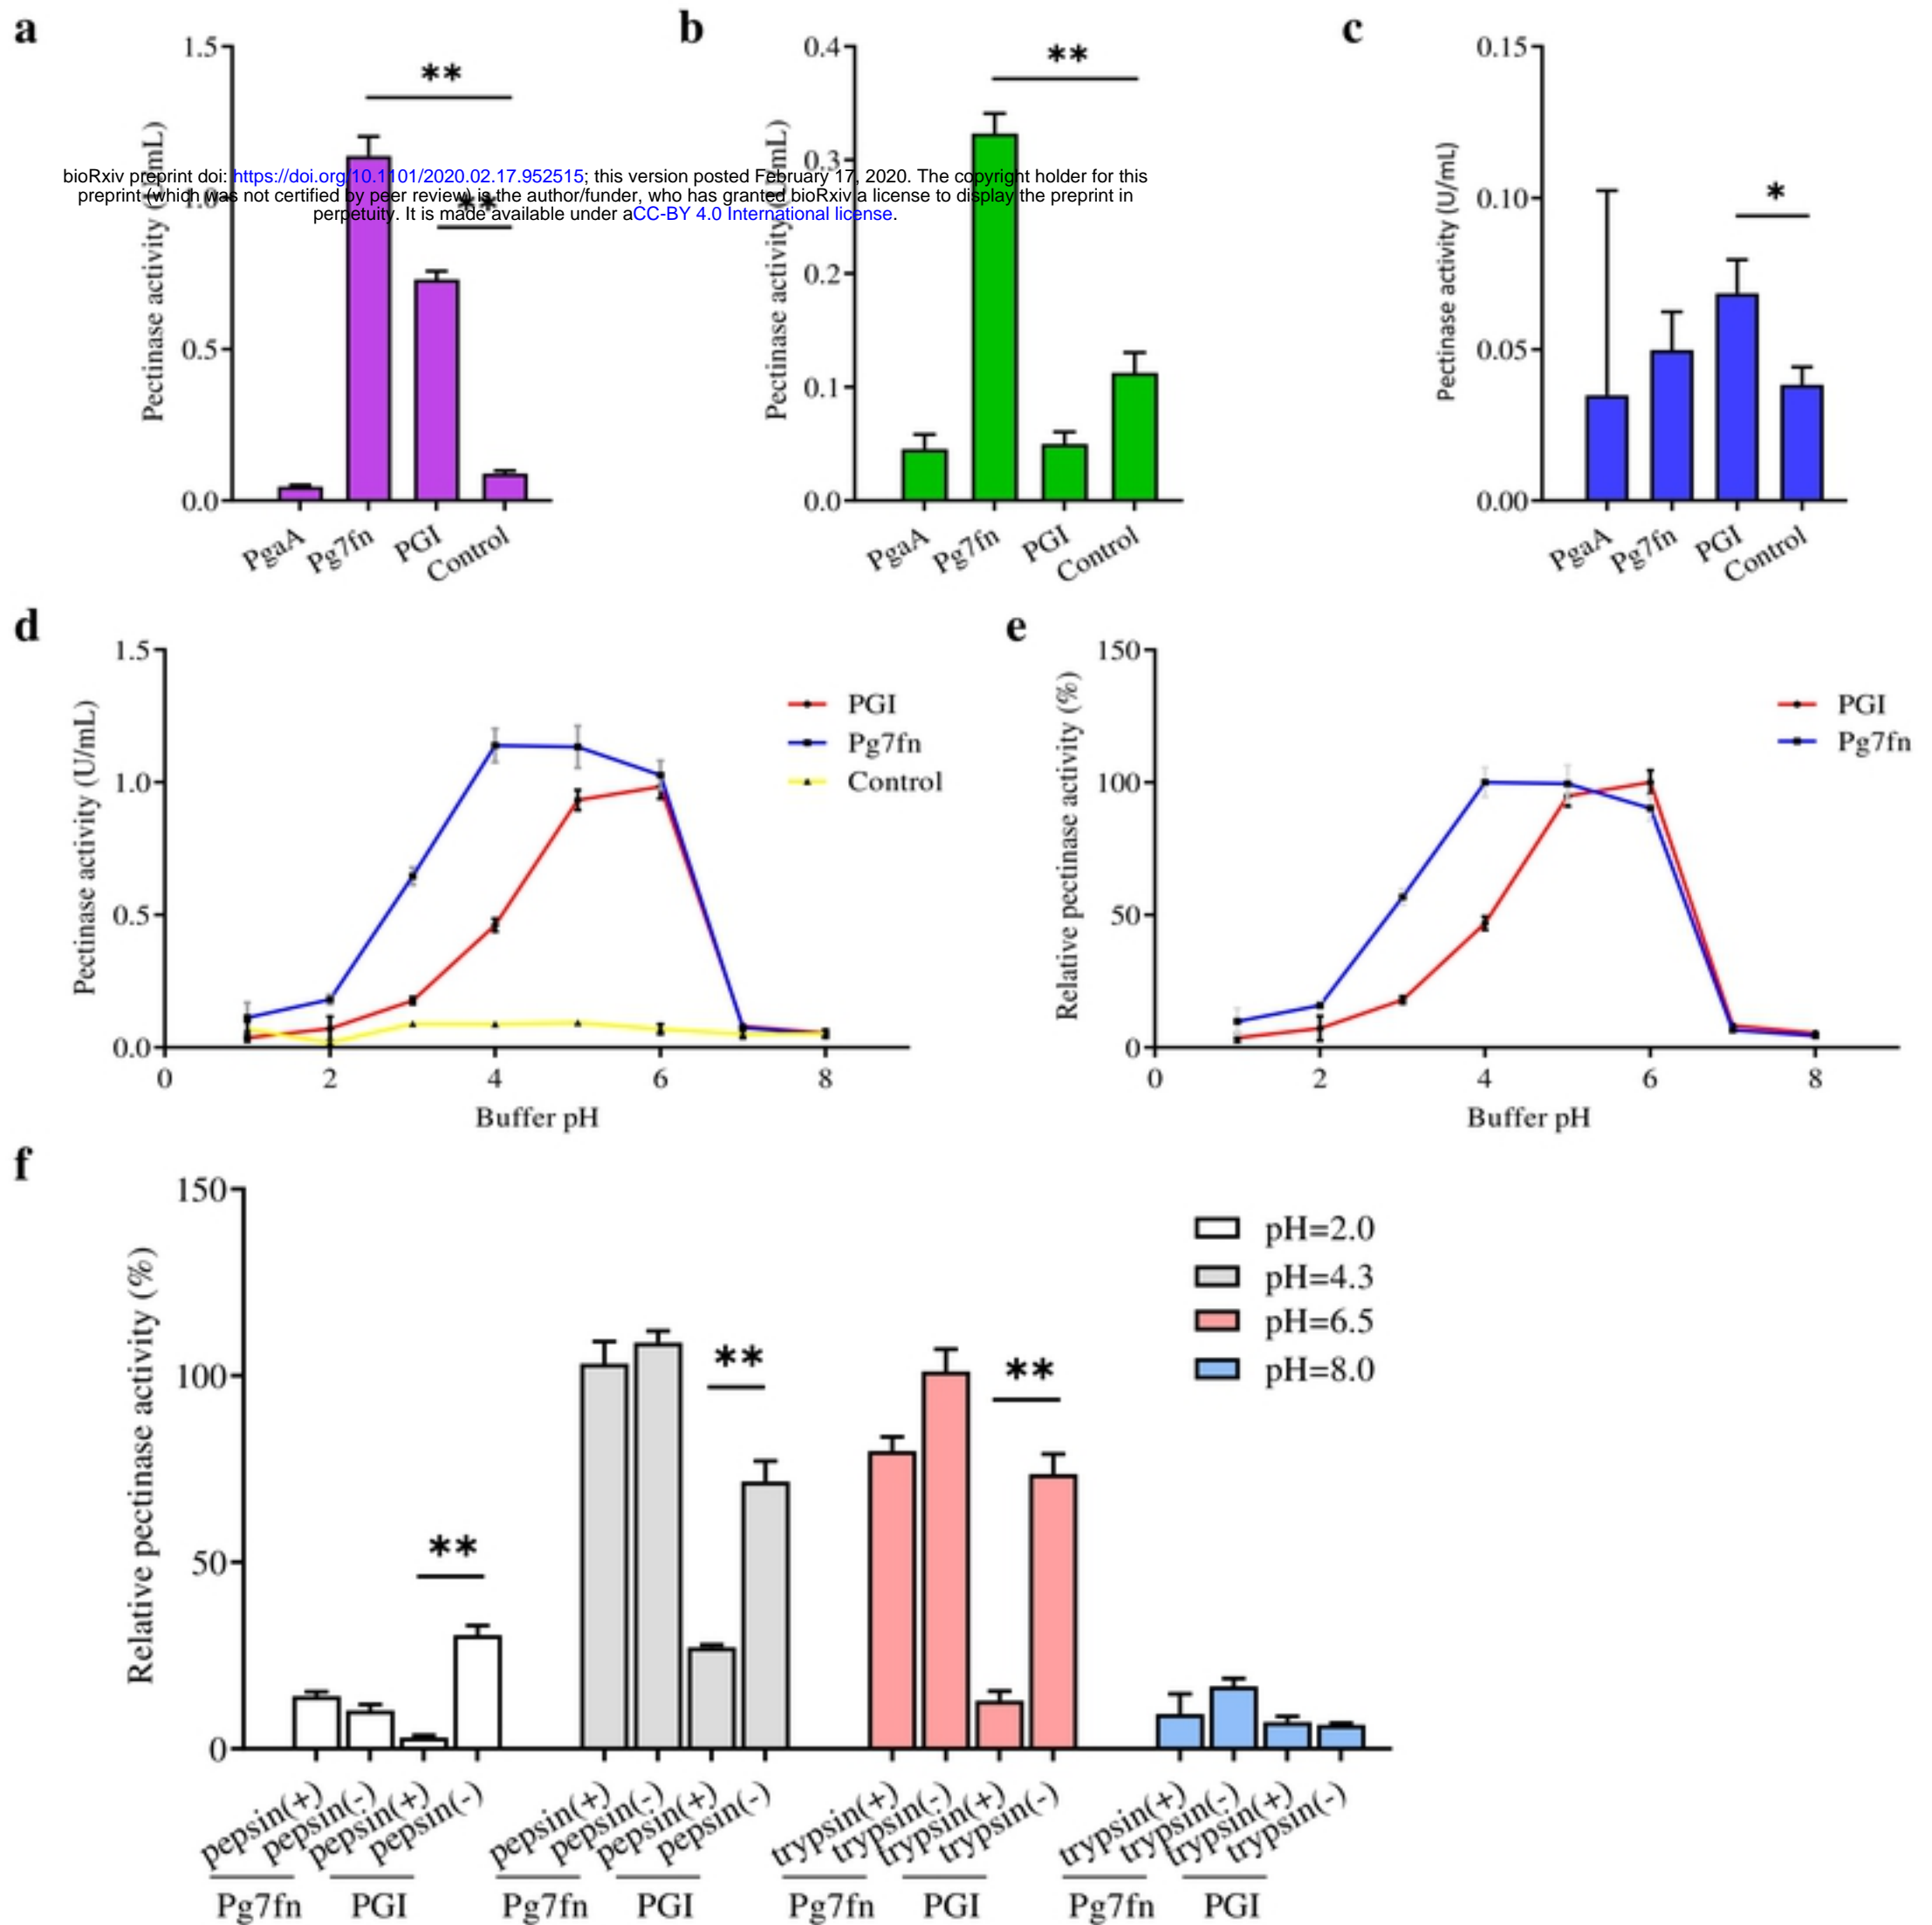

Fig 1. Characterization of the three pectinase genes expressed in

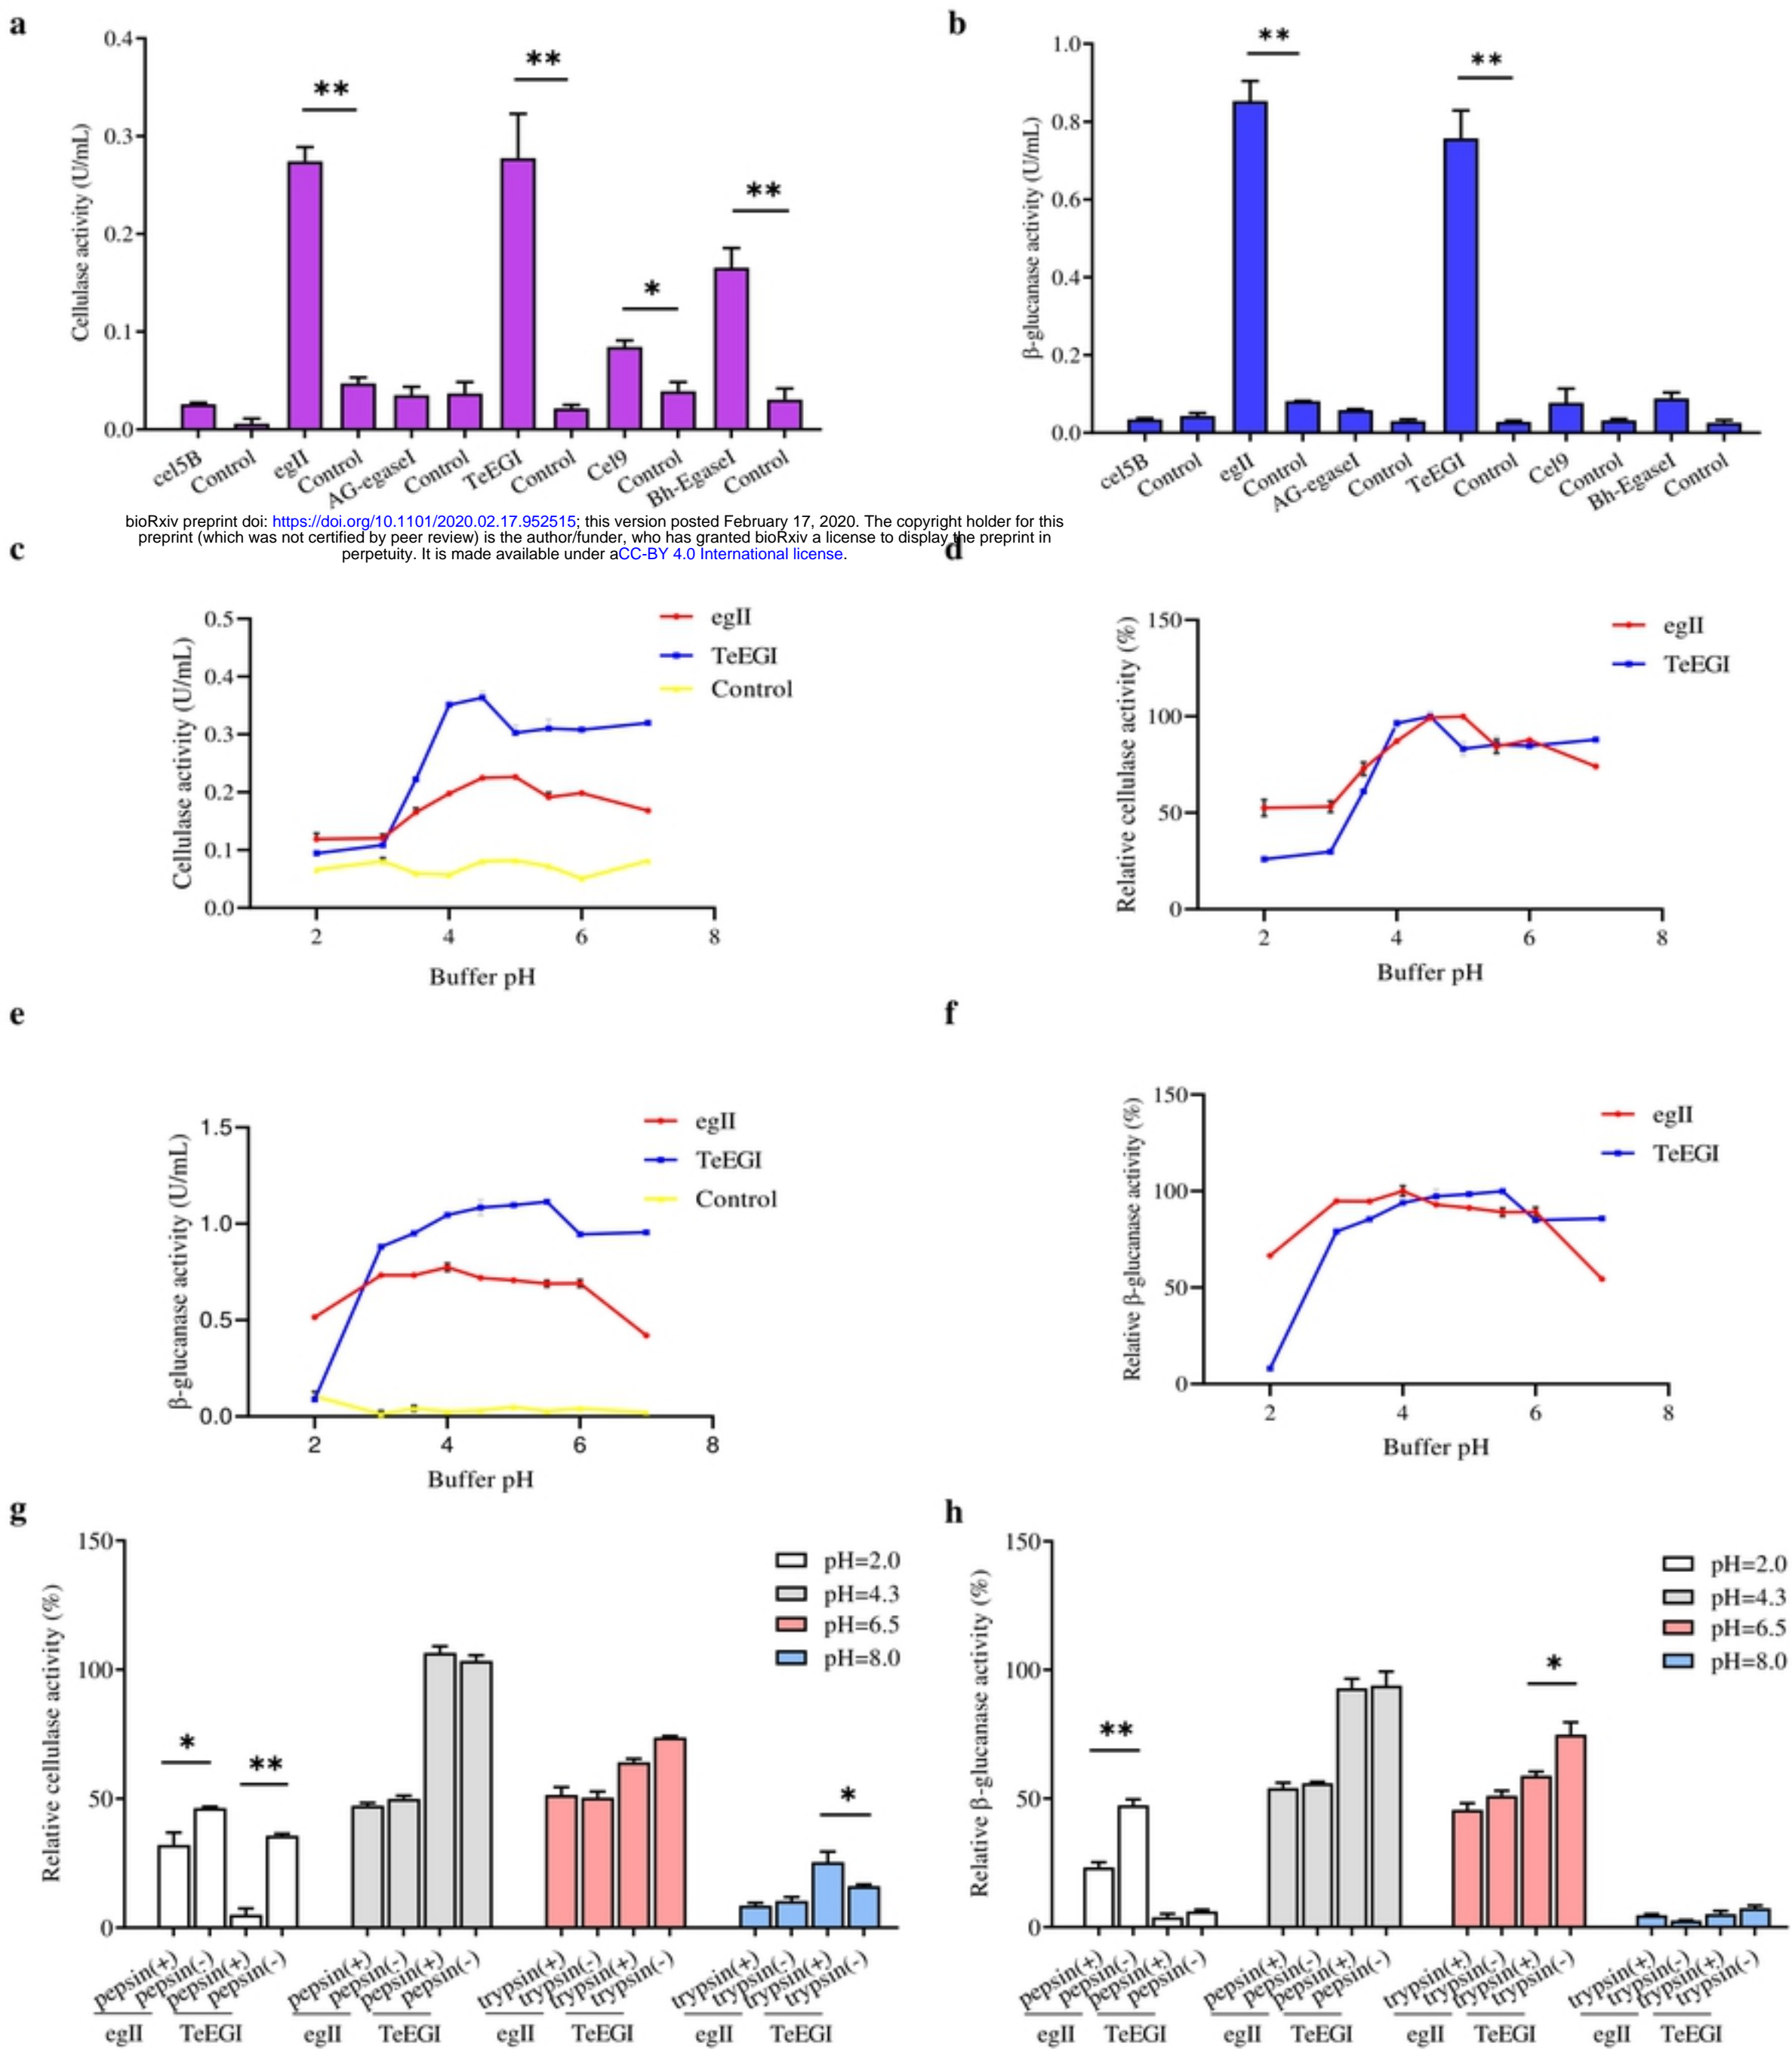



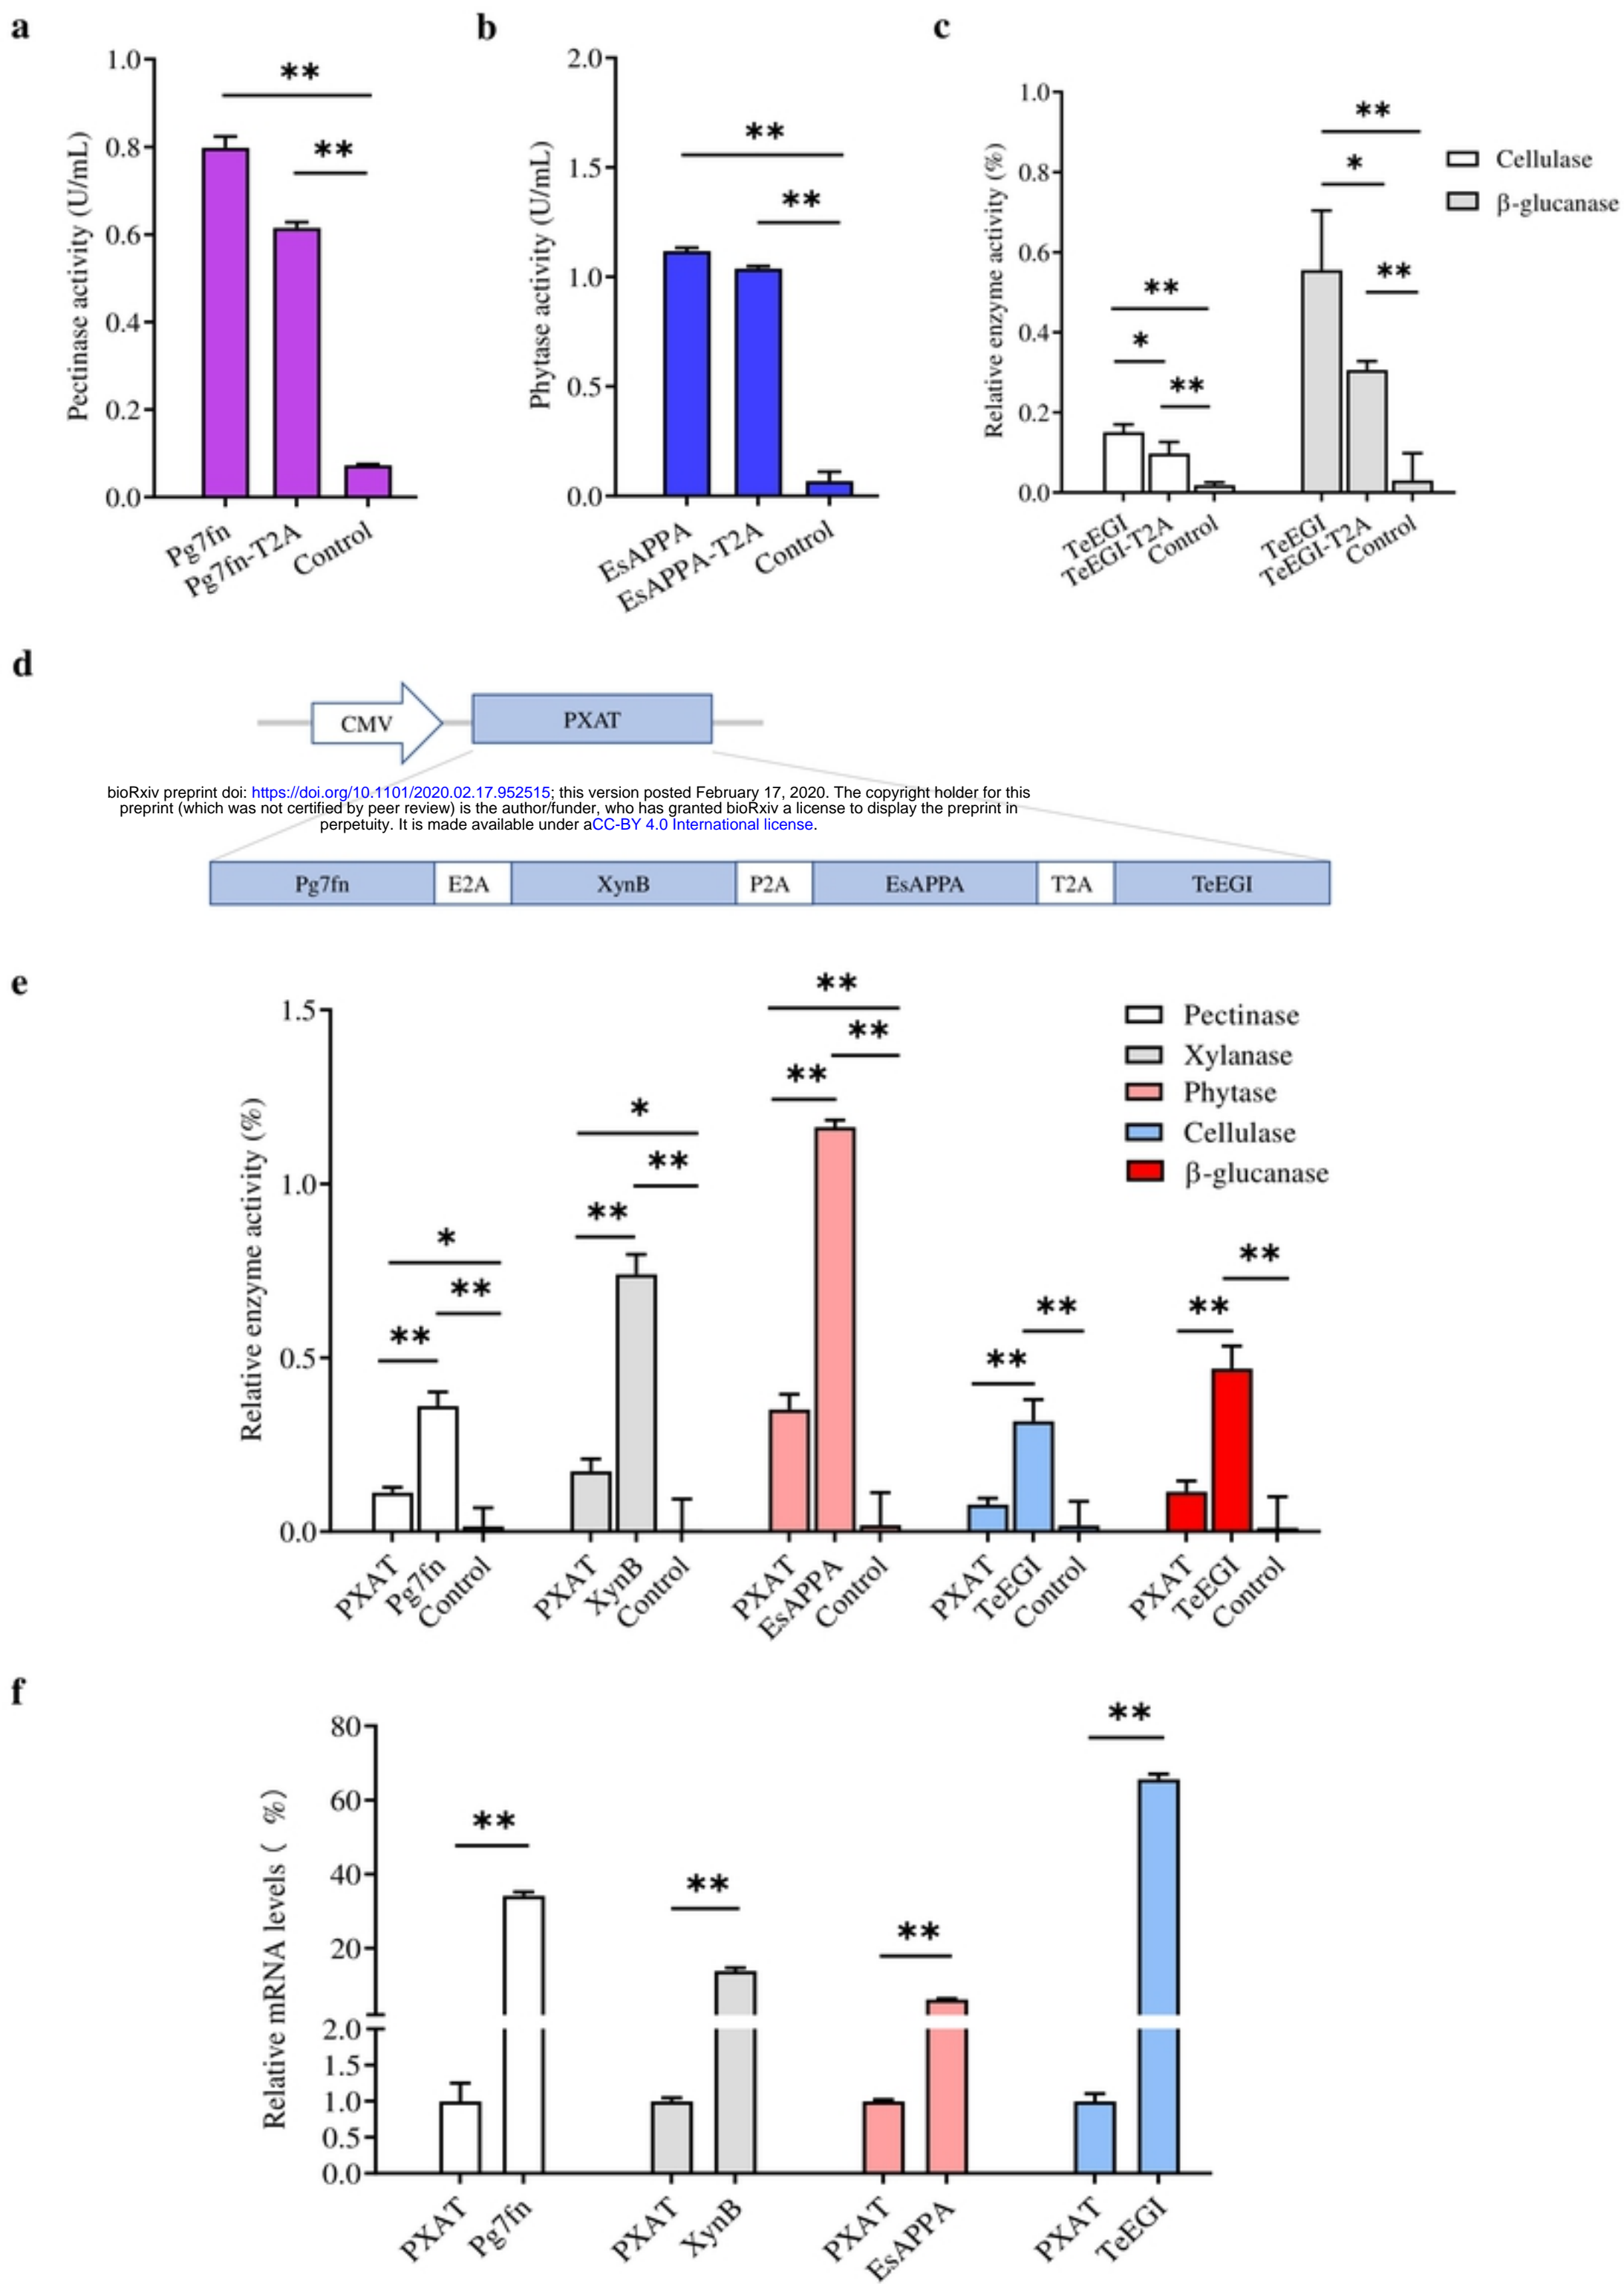

Fig 3. Enzyme activity between the polycistronic and single gene

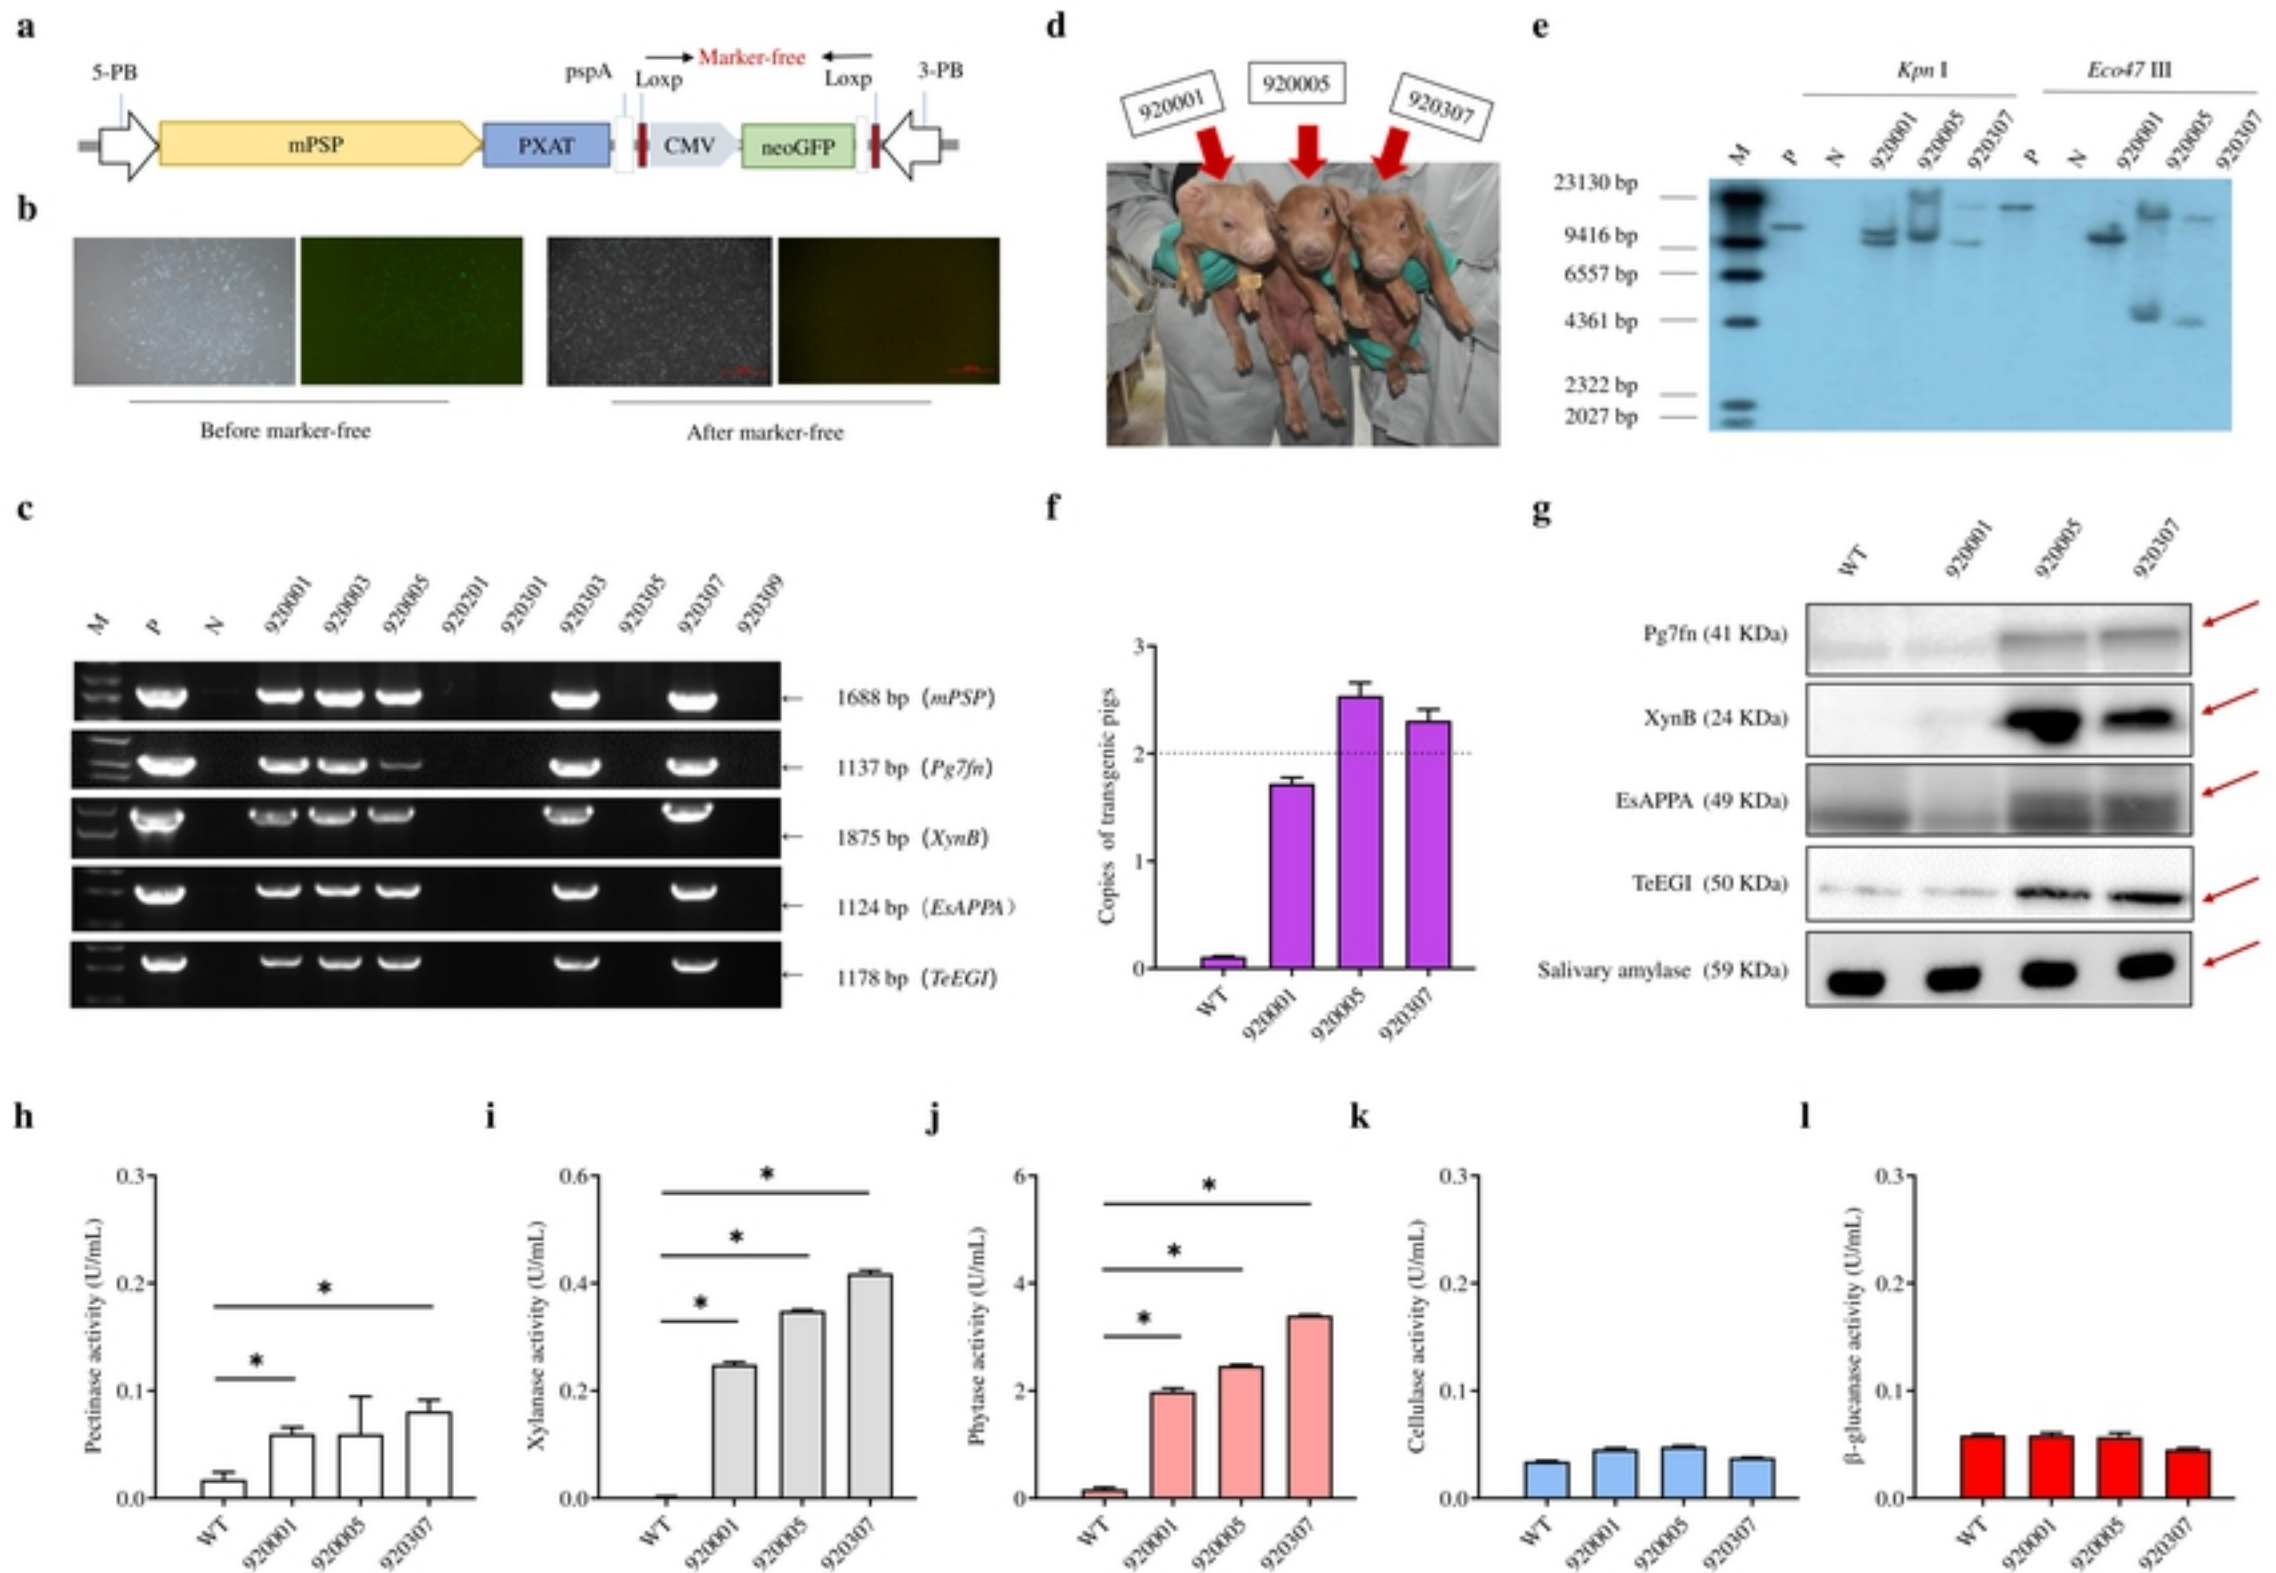

Fig 4. Generation and identification of the transgenic pigs.
